# Supplementary material for: Human Intestinal Lumen and Mucosa-Associated Microbiota in Patients with Colorectal Cancer
Source: PubMed Central journal article supplement (PMC3386193; doi:10.1371/journal.pone.0039743), 2012-06-28
Supplement: pone.0039743.s001.pdf [file pone.0039743.s001.pdf]

Number of OTUs Observed

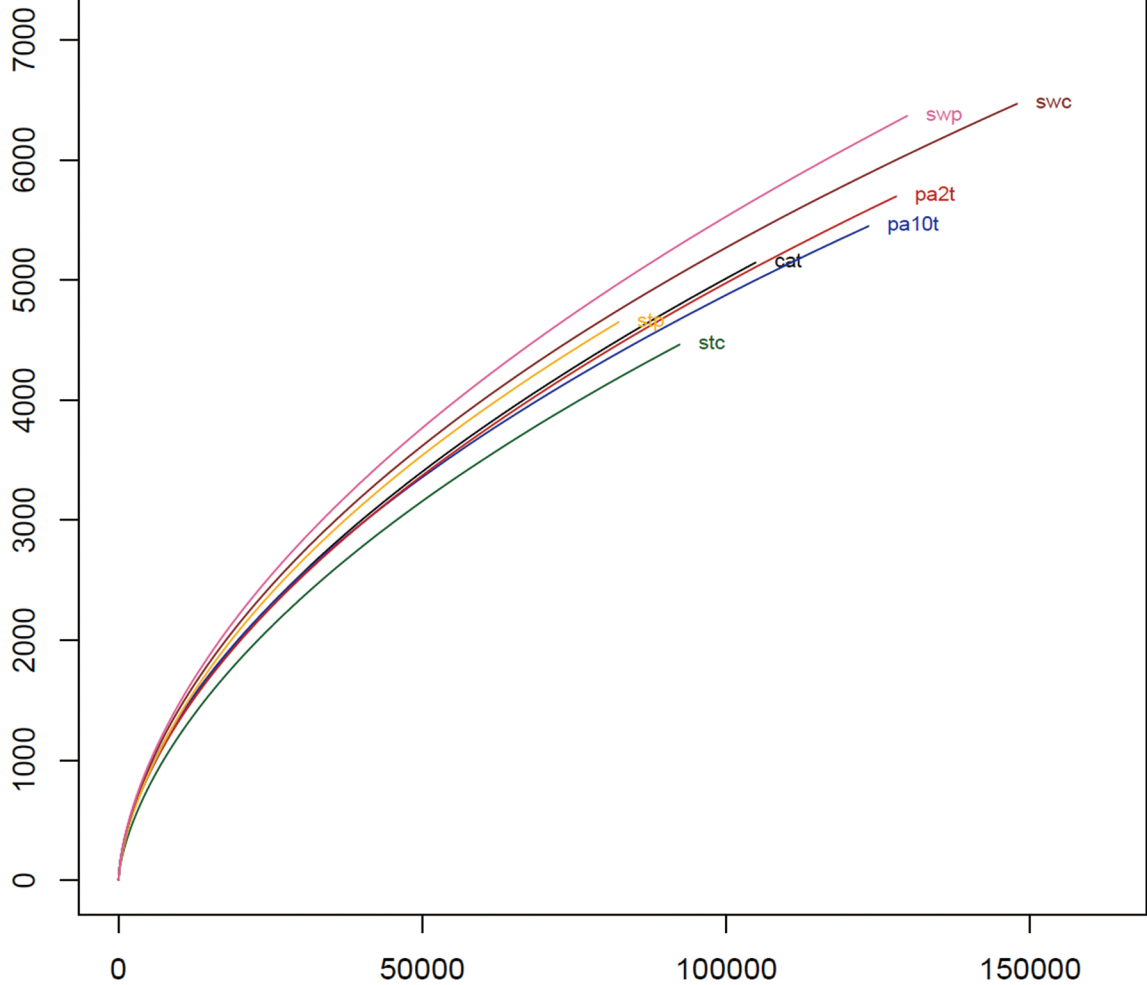

Number of Reads Sampled
